# Supplementary material
Source: publisher figshare collection journal article supplement (https://gsapubs.figshare.com/articles/dataset/_/14998629)
Supplement: Supplementary file 2 [file 2]

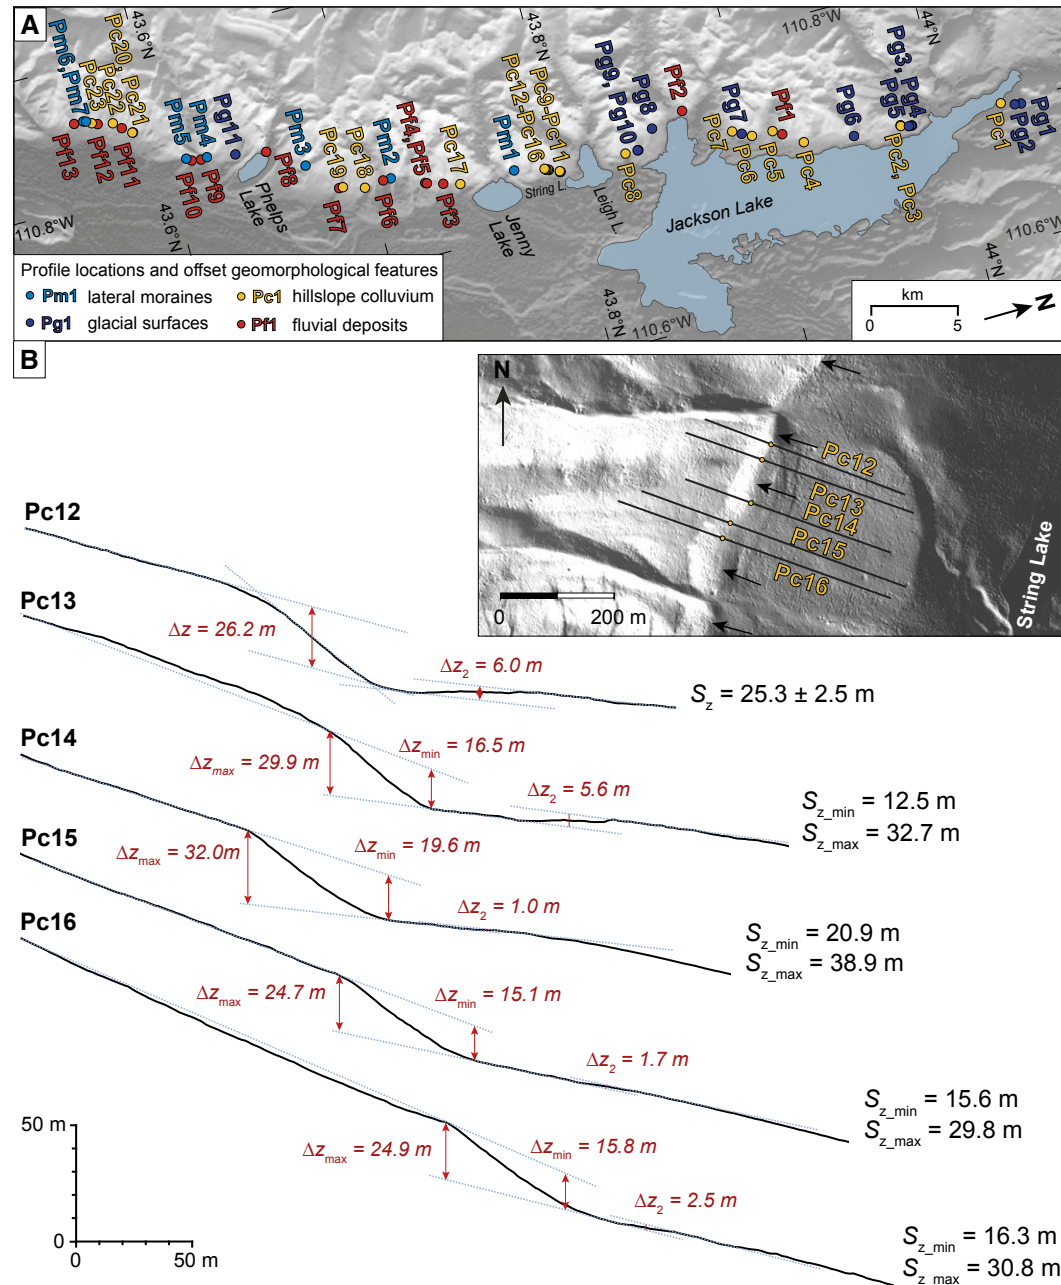

Figure 5 is interactive. Place the mouse cursor over the names or color-filled circles of the scarp profiles in A to view the related scarp profiles and detailed location maps in B. To interact with Figure 5 if reading the full-text version of this paper, please visit <https://doi.org/10.1130/GEOS.S.14998629>.

Figure 5 (interactive). Determination of the vertical separation  $\Delta z$  and vertical slip  $S_z$  from topographic profiles across scarps of the Teton fault. (A) Location map showing names and locations (color-filled circles) of the scarp profiles. (B) Profiles and their detailed location maps. The colored dot in the middle of each profile line represents the base of the scarp (Table 1). Arrows (black or white) indicate the surface trace of the Teton fault. Figures S1–S4 (see text footnote 1) show the profiles grouped by the type of offset geomorphological feature. Note for viewing: Please place the mouse cursor over the names or color-filled circles of the scarp profiles in A to view the related scarp profiles and detailed location maps in B. To interact with Figure 5 if reading the full-text version of this paper, please visit <https://doi.org/10.1130/GEOS.S.14998629>.
